# Supplementary material for: Understanding the interfacial interactions between dopamine and different graphenes for biomedical materials
Source: Royal Society of Chemistry journal article supplement (doi:10.1039/c6qm00300a), 2016-12-22
Supplement: c6qm00300a1.pdf [file c6qm00300a1.pdf]

## Supporting Information

# Understanding the interfacial interactions between dopamine and different graphenes for biomedical materials

Hong-ping Zhang <sup>a,\*</sup>, Xuegang Luo <sup>a</sup>, Xiaoyan Lin <sup>a</sup>, Xiong Lu <sup>b</sup>, Zhenming Wang <sup>b</sup>,  
Liming Fang <sup>c</sup>, Youhong Tang <sup>d,\*</sup>

<sup>a</sup> Engineering Research Center of Biomass Materials, Ministry of Education, School of Materials Science and Engineering, Southwest University of Science and Technology, Mianyang 621010, China

<sup>b</sup> Key Laboratory of Advanced Technologies of Materials, Ministry of Education, School of Materials Science and Engineering, Southwest Jiaotong University, Chengdu 610031, China.

<sup>c</sup> School of Materials Science and Engineering, South China University of Technology, Guangzhou 510641, China

<sup>d</sup> Centre for NanoScale Science and Technology and School of Computer Science, Engineering and Mathematics, Flinders University, South Australia 5042, Australia

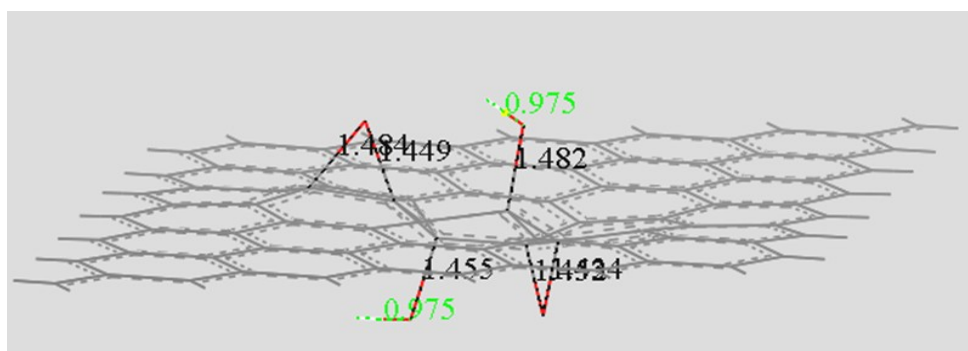

Figure S1: Optimized model of graphene oxide. Bond lengths of C-O of ortho epoxy were shown in black, and bond lengths of OH were shown in green.

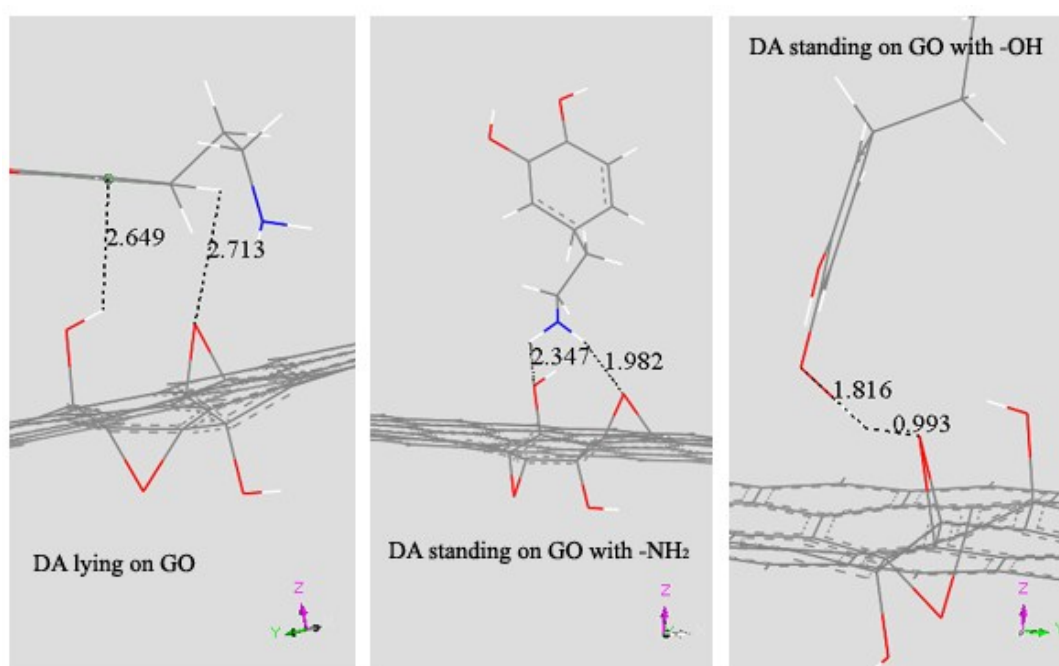

Figure S2: Optimized GO-DA interacting system, DA lying, standing with  $\text{-NH}_2$  and standing with  $\text{-OH}$  on GO from left to right.
